# Supplementary material for: Effects of Intra-Articular D-Amino Acids Combined With Systemic Vancomycin on an Experimental Staphylococcus Aureus-Induced Periprosthetic Joint Infection
Source: Research Square preprint supplement (doi:10.21203/rs.3.rs-113375/v1), 2020-12-03
Supplement: Supplementary file 1 [file f28fbae8e3e276242028cec7.xlsx]

## Sheet: Sheet1
Table 1 Description of staphylococcus aureus strains investigated in this study
Strain	Site of isolation	Phenotype	Biofilm formationa
ATCC25923	─	MSSA	Strong
Clinical isolate 1	Synovium	MSSA	Strong
Clinical isolate 2	Bone	MRSA	Week
Clinical isolate 3	Implant	MRSA	Strong
Clinical isolate 4	Implant	MRSA	Strong
a Biofilm formation classification is based on previous studies comparing the biofilm forming capacity compared to a biofilm positive control, S. epidermidis ATCC 12228; strong indicates biofilm ≥ than S. epidermidis and weak indicates biofilm ≤ than the control[27].
